# Supplementary material for: Emergence of a novel mobile colistin resistance gene, mcr-8, in NDM-producing Klebsiella pneumoniae
Source: PubMed Central journal article supplement (PMC6030107; doi:10.1038/s41426-018-0124-z), 2018-07-04
Supplement: 41426_2018_124_MOESM1_ESM.pdf [file 41426_2018_124_MOESM1_ESM.pdf]

Table S1 PCR primers and conditions used in this study.

| Primers | Sequence(5'-3')          | Annealing Temperature( °C) | Product Size(bp) | Reference  |
|---------|--------------------------|----------------------------|------------------|------------|
| MCR-1F  | ATCAGCCAAACCTATCCCATCG   | 55                         | 1257             | This study |
| MCR-1R  | GCAGACGCACAGCAATGCCTAT   |                            |                  |            |
| MCR-2F  | GCGATGGCGGTCTATCCTGTAT   | 55                         | 378              | This study |
| MCR-2R  | TGCGATGACATGGGGTGTGTCAGC |                            |                  |            |
| MCR-3F  | TATGGGTTACTATTGCTGG      | 55                         | 814              | This study |
| MCR-3R  | CTACCCTGATGCTCATCG       |                            |                  |            |
| MCR-4F  | GTCATAGTGGTATAAAAAGTACAG | 55                         | 669              | This study |
| MCR-4R  | CCACCGTCTATCAGAGCCAAC    |                            |                  |            |
| MCR-5F  | GCGGTTGTCTGCATTTATCAC    | 55                         | 1042             | This study |
| MCR-5R  | CTTTGAAAACCTGTCTTCGGCA   |                            |                  |            |
| MCR-6F  | GTCCGGTCAATCCCTATCTGT    | 55                         | 556              | This study |
| MCR-6R  | ATCACGGGATTGACATAGCTAC   |                            |                  |            |
| MCR-7F  | TGCTCAAGCCCTTCTTTTCGT    | 55                         | 892              | This study |
| MCR-7R  | TTCATCTGCGCCACCTCGT      |                            |                  |            |
| MCR-8F  | AACCGCCAGAGCACAGAATT     | 60                         | 667              | This study |
| MCR-8R  | TTCCCCCAGCGATTCTCCAT     |                            |                  |            |
| NDM-F   | GGTTTGGCGATCTGGTTTTTC    | 55                         | 621              | 1          |
| NDM-R   | CGGAATGGCTCATCACGATC     |                            |                  |            |
| KPC-F   | CGTCTAGTTCTGCTGTCTTG     | 55                         | 566              | 1          |
| KPC-R   | CTTGTCATCCTTGTTAGGCG     |                            |                  |            |
| VIM-F   | GATGGTGTGTTGGTCGCATA     | 55                         | 390              | 1          |
| VIM-R   | CGAATGCGCAGCACCAG        |                            |                  |            |
| OXA-F   | GCGTGGTTAAGGATGAACAC     | 55                         | 438              | 1          |
| OXA-R   | CATCAAGTTCAACCCAACCG     |                            |                  |            |
| IMP-F   | GGAATAGAGTGGCTTAAYTCTC   | 55                         | 232              | 1          |
| IMP-R   | GGTTTAAAYAAAACAACCACC    |                            |                  |            |

1. Poirel, L. et al. Multiplex PCR for detection of acquired carbapenemase genes. *Diagn. Micr. Infec. Dis.* 70, 119-23 (2011).

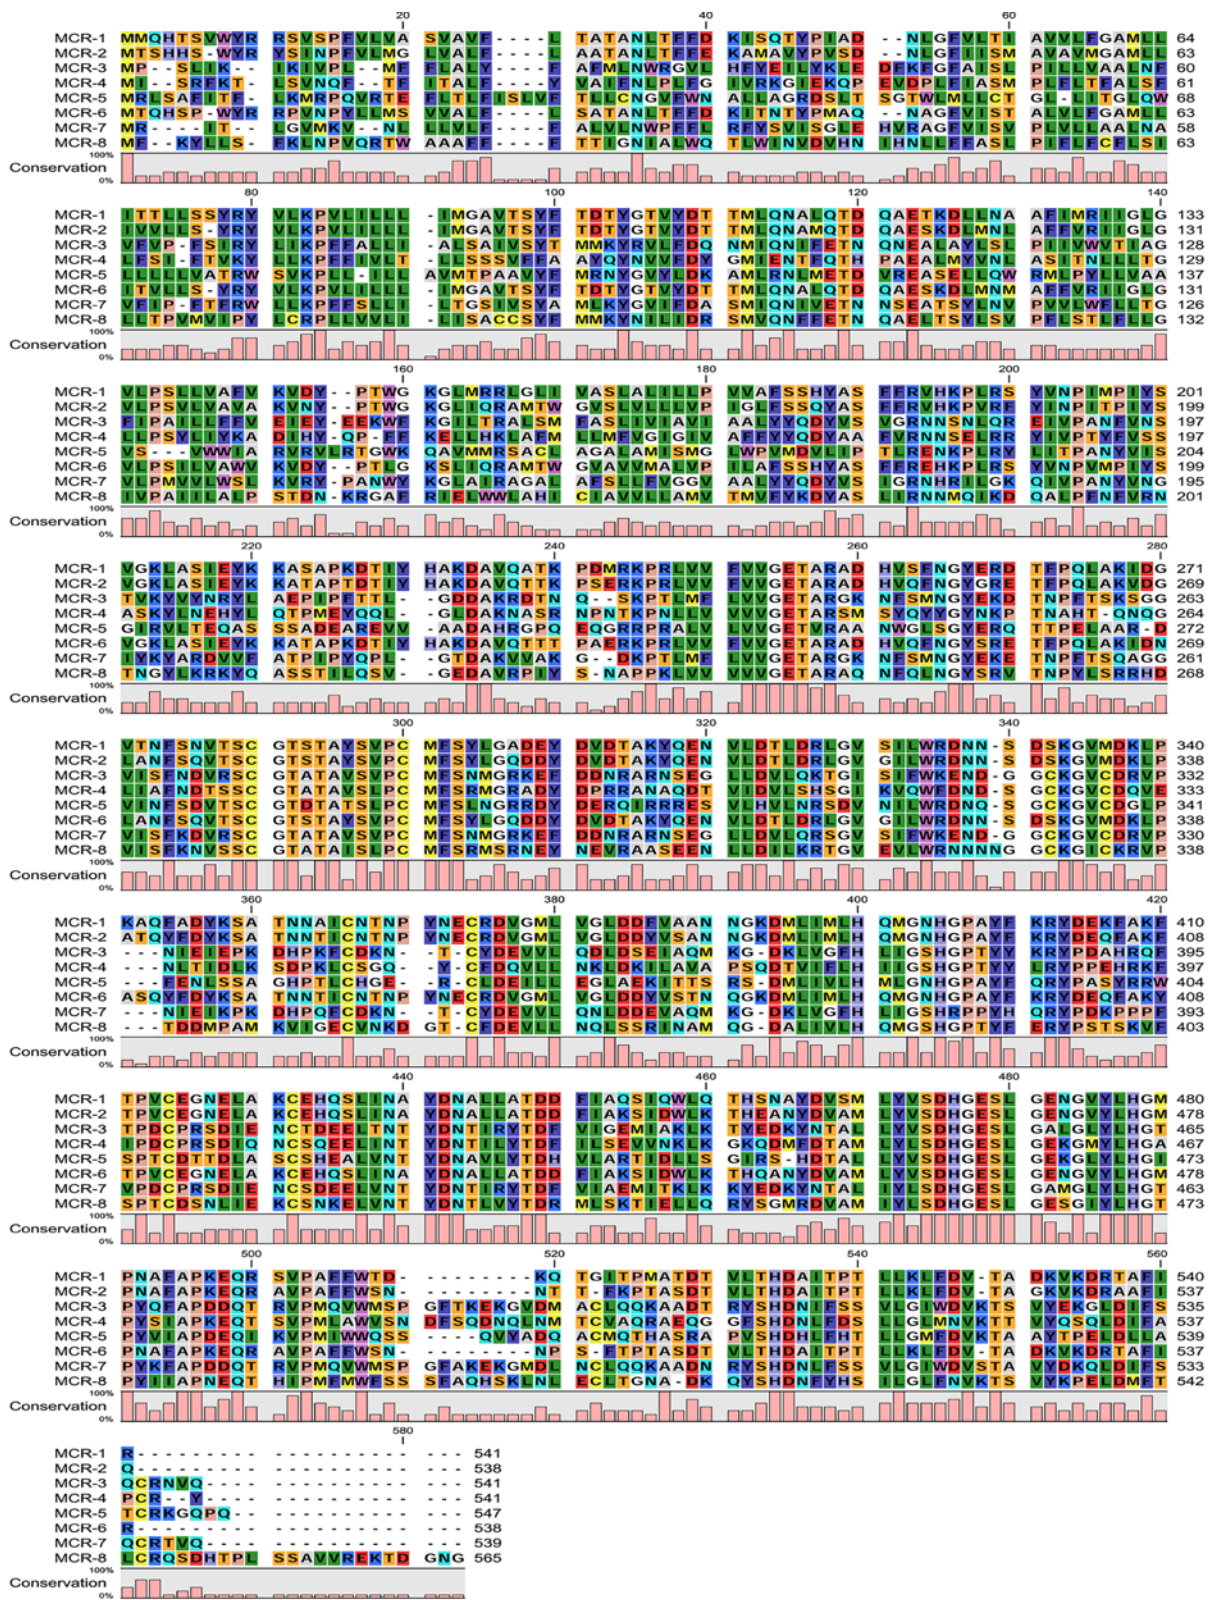

Figure S1. Alignment of the predicted amino acid sequences of MCR-1, MCR-2, MCR-3, MCR-4, MCR-5, MCR-6, MCR-7 and MCR-8, and created using CLC Genomics Workbench 9 (CLC Bio-Qiagen, Aarhus, Denmark).

**Table S2.** Information of *mcr-6* and *mcr-6*-like genes and their deduced MCR-6 and MCR-6-like proteins collected from GenBank database

| Strain                              | Nucleotide ID     | Nucleotide identity with <i>mcr-6</i> | Protein ID     | Protein identity with MCR-6 | Country        | Sample source       | Date of sample collection/data submission (yyyy/mm/dd) |
|-------------------------------------|-------------------|---------------------------------------|----------------|-----------------------------|----------------|---------------------|--------------------------------------------------------|
| <i>Klebsiella pneumoniae</i>        | NZ_MPOD01000035.1 | 99.7%                                 | WP_072310976.1 | 99%                         | China          | Human sputum        | 2016/5                                                 |
| <i>Kosakonia sacchari</i>           | NZ_CP016337.1     | 64.2%                                 | WP_065368351.1 | 70%                         | Japan          | Sweet Potato        | 2017/4/13                                              |
| <i>Kosakonia pseudosacchari</i>     | NZ_NITV01000001.1 | 63.6%                                 | WP_097399671.1 | 70%                         | China          | Sugarcane roots     | 2017/10/13                                             |
| <i>Klebsiella aerogenes</i>         | NZ_JXTQ01000011.1 | 61.9%                                 | WP_043865414.1 | 66%                         | Belgium        | Cucurbita pepo      | 2017/4/06                                              |
| <i>Pectobacterium carotovorum</i>   | NC_012917.1       | 64.2%                                 | WP_015840357.1 | 69%                         | United States  | Carrot              | 2017/3/30                                              |
| <i>Lampropedia hyalina</i>          | NZ_FQUZ01000022.1 | 63.7%                                 | WP_073356508.1 | 68%                         | United States  | Unknown             | 2017/4/17                                              |
| <i>Xanthomonas citri</i>            | CP016836.1        | 60.7%                                 | ASR42364.1     | 65%                         | China          | Mango               | 2017/8/3                                               |
| <i>Xanthomonas retroflexus</i>      | NZ_FRDD01000007.1 | 56.4%                                 | WP_088099975.1 | 60%                         | Denmark        | Unknown             | 2017/6/16                                              |
| <i>Rubrivivax gelatinosus</i>       | AP012320.1        | 58.9%                                 | BAL95649.1     | 65%                         | Japan          | Unknown             | 2016/10/7                                              |
| <i>Stenotrophomonas maltophilia</i> | NZ_PEJT01000001.1 | 57.7%                                 | WP_099818484.1 | 62%                         | Germany        | Rice paddy          | 2017/11/09                                             |
|                                     | NZ_LZPC01000026.1 | 55.2%                                 | WP_065179212.1 | 62%                         | France         | Manures             | 2017/4/5                                               |
|                                     | NZ_MQWX01000061.1 | 55.1%                                 | WP_099589211.1 | 61%                         | Italy          | Human lung          | 2017/11/5                                              |
|                                     | NZ_NEQS01000012.1 | 57.3%                                 | WP_100465422.1 | 61%                         | Spain          | Potato              | 2017/12/3                                              |
|                                     | LQNV01000616.1    | 54.4%                                 | KUP00845.1     | 61%                         | Brazil         | Human blood         | 2016/1/15                                              |
|                                     | AZAE01000001.1    | 57.0%                                 | EVT72525.1     | 60%                         | Czech Republic | Soil                | 2014/2/04                                              |
|                                     | LDAV01000276.1    | 55.4%                                 | KLN99845.1     | 61%                         | Saudi Arabia   | Water               | 2015/06/5                                              |
|                                     | NZ_LLXW01000101.1 | 55.01%                                | WP_057500426.1 | 61%                         | India          | Cerebrospinal fluid | 2016/06/3                                              |
|                                     | NZ_ALYK02000025.1 | 60.4%                                 | WP_017354816.1 | 63%                         | China          | Human sputum        | 2017/4/11                                              |
| <i>Stenotrophomonas rhizophila</i>  | CP007597.1        | 59.6%                                 | AHY58671.1     | 64%                         | Austria        | Brassica napus      | 2014/5/1                                               |
| <i>Stenotrophomonas sp</i>          | NZ_JFYS01000001.1 | 56.5%                                 | WP_051584849.1 | 60%                         | Malaysia       | Shrub willow        | 2017/4/9                                               |
